# Supplementary material for: Hippocampal atrophy has limited usefulness as a diagnostic biomarker on the early onset Alzheimer's disease patients: A comparison between visual and quantitative assessment
Source: PubMed Central journal article supplement — Neuroimage Clin. 2019 Jul 5;23:101927. doi: 10.1016/j.nicl.2019.101927 (PMC6627030; doi:10.1016/j.nicl.2019.101927), 2019-07-05
Supplement: mmc1.pdf [file mmc1.pdf]

# Freesurfer Report

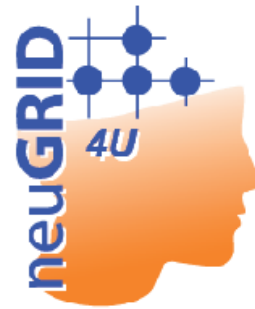

## Subject info

**Patient ID:** 20091023\_113432MPRAGESAGIPATISOPROVAs002a1001      **Sex:**  
M      **Age:** 66

## Freesurfer Recon-All<sup>1</sup>

**Model:** Recon-All FS v5.3

**Left Volume:** 5947  $mm^3$

**Right Volume:** 5714  $mm^3$

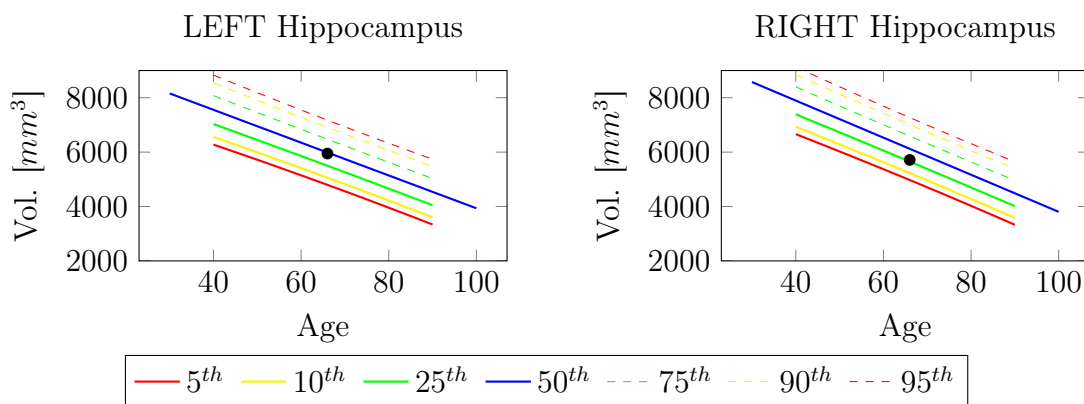

Every colored line represents the *Prediction Percentile* for the hippocampal volume of a normative dataset made of 238 *ADNI* healthy elderly controls. In these graphs the left and right hippocampal volumes of the patient are represented by black dots.

<sup>1</sup>B. Fischl *FreeSurfer*. Neuroimage, 62 (2012), 2:774-81. Results

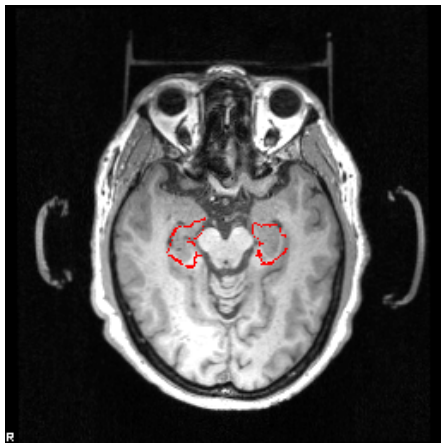

(a)

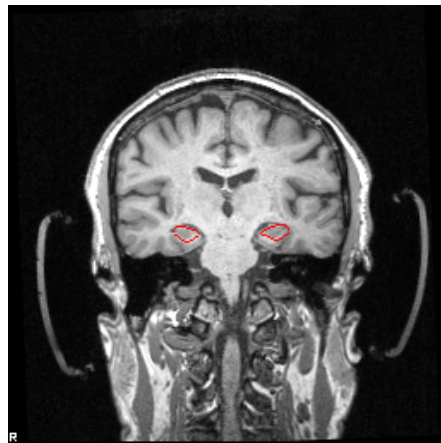

(b)

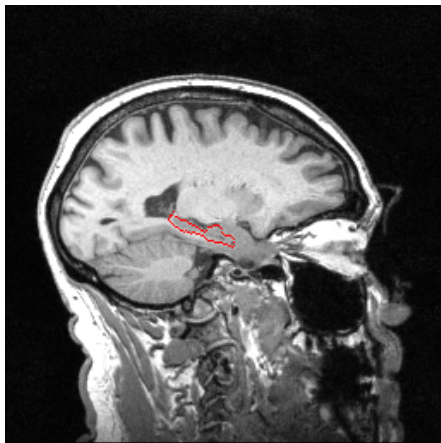

(c)

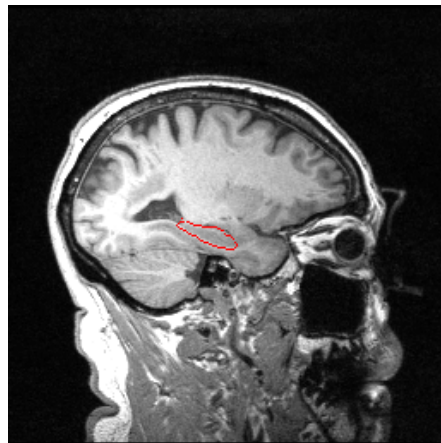

(d)

**Figure 1:** Segmentation of the brain scan in the native space. The letter “R” identifies the Right direction. (a) Axial view. (b) Coronal view. (c) Sagittal view centered on the Right Hippocampus. (d) Sagittal view centered on the Left Hippocampus.
